# Supplementary material for: Understanding colloidal behavior in açaí (Euterpe oleraceae)-based nanoemulsions
Source: PeerJ journal article supplement (doi:10.7717/peerj-ochem.13), 2025-04-24
Supplement: Raw_data.xlsx [file Raw_data.xlsx]

## Sheet: HLB 11
Quality Indicator	Measurement Type	Result State	Sample Name	Record Created Date	Measurement Start Date And Time	Temperature (°C)	Z-Average (nm)	Polydispersity Index (PI)	Peak 1 Area by Intensity ordered by area (%)	Peak 2 Area by Intensity ordered by area (%)	Zeta Potential (mV)	Conductivity (mS/cm)
GoodData	Size	Completed	EHL 11 1:60 (DAY 0)	2025-01-14 13:35:54	2023-06-06 13:22:02	25.01	237.4	0.1612	100
GoodData	Size	Completed	EHL 11 1:60 (DAY 0)	2025-01-14 13:35:54	2023-06-06 13:22:52	25	244.2	0.1768	100
AdviceAvailable	Size	Completed	EHL 11 1:60 (DAY 0)	2025-01-14 13:35:54	2023-06-06 13:24:19	25	251.3	0.2051	98.1	1.897
NoData	Size	Completed	EHL 11 1:60 (DAY 0) (Avg)	2025-01-14 13:36:38	2023-06-06 13:25:09	25.01	244.2	0.1818	98.18	1.821
GoodData	Size	Completed	EHL 11 1:60 (DAY 1)	2025-01-14 13:37:10	2023-06-07 15:21:42	25.01	267.8	0.1103	100
AdviceAvailable	Size	Completed	EHL 11 1:60 (DAY 1)	2025-01-14 13:37:10	2023-06-07 15:22:33	25	275.1	0.2255	90.01	9.985
AdviceAvailable	Size	Completed	EHL 11 1:60 (DAY 1)	2025-01-14 13:37:10	2023-06-07 15:24:01	25	283.9	0.2735	95.39	4.606
NoData	Size	Completed	EHL 11 1:60 (DAY 1) (Avg)	2025-01-14 13:37:31	2023-06-07 15:25:03	25.01	274.7	0.2123	98.1	1.896
AdviceAvailable	Size	Completed	EHL 11 1:60 (DAY 7)	2025-01-14 13:37:52	2023-06-13 11:48:33	25.01	276.8	0.2406	98.05	1.946
AdviceAvailable	Size	Completed	EHL 11 1:60 (DAY 7)	2025-01-14 13:37:52	2023-06-13 11:49:36	25	285.7	0.2306	98.02	1.984
AdviceAvailable	Size	Completed	EHL 11 1:60 (DAY 7)	2025-01-14 13:37:52	2023-06-13 11:51:03	25.01	288.8	0.2833	82.2	17.8
NoData	Size	Completed	EHL 11 1:60 (DAY 7) (Avg)	2025-01-14 13:38:13	2023-06-13 11:51:41	25.01	283.7	0.2513	93.48	6.517

## Sheet: HLB 11 ramp
Quality Indicator	Measurement Type	Result State	Sample Name	Record Created Date	Measurement Start Date And Time	Temperature (°C)	Z-Average (nm)	Polydispersity Index (PI)	Peak 1 Area by Intensity ordered by area (%)	Peak 2 Area by Intensity ordered by area (%)	Zeta Potential (mV)	Conductivity (mS/cm)
GoodData	Size	Completed	NEAÇ EHL 11 1:60 (T)	2023-06-06 15:34:44	2023-06-06 15:34:44	25	234.4	0.2188	100
AdviceAvailable	Size	Completed	NEAÇ EHL 11 1:60 (T)	2023-06-06 15:36:01	2023-06-06 15:36:02	25	255.5	0.2193	97.69	2.312
GoodData	Size	Completed	NEAÇ EHL 11 1:60 (T)	2023-06-06 15:37:04	2023-06-06 15:37:05	25	250.5	0.2483	100
NoData	Size	Completed	NEAÇ EHL 11 1:60 (T) (Avg)	2023-06-06 15:37:55	2023-06-06 15:37:55	25	246.3	0.2315	94.64	5.362
AdviceAvailable	Size	Completed	NEAÇ EHL 11 1:60 (T)	2023-06-06 15:38:51	2023-06-06 15:38:51	30.01	226.1	0.2451	98.55	1.453
AdviceAvailable	Size	Completed	NEAÇ EHL 11 1:60 (T)	2023-06-06 15:40:18	2023-06-06 15:40:19	30	253.2	0.2266	98.44	1.565
AdviceAvailable	Size	Completed	NEAÇ EHL 11 1:60 (T)	2023-06-06 15:41:34	2023-06-06 15:41:35	30	267.9	0.2251	96.51	3.489
NoData	Size	Completed	NEAÇ EHL 11 1:60 (T) (Avg)	2023-06-06 15:42:25	2023-06-06 15:42:25	30.01	248.3	0.2355	96.85	3.151
AdviceAvailable	Size	Completed	NEAÇ EHL 11 1:60 (T)	2023-06-06 15:43:22	2023-06-06 15:43:22	35	242.4	0.2864	80.43	19.57
GoodData	Size	Completed	NEAÇ EHL 11 1:60 (T)	2023-06-06 15:44:13	2023-06-06 15:44:13	35.01	238.9	0.2674	100
GoodData	Size	Completed	NEAÇ EHL 11 1:60 (T)	2023-06-06 15:45:41	2023-06-06 15:45:41	35	256.6	0.2187	100
NoData	Size	Completed	NEAÇ EHL 11 1:60 (T) (Avg)	2023-06-06 15:47:09	2023-06-06 15:47:09	35	244	0.276	97	2.999
AdviceAvailable	Size	Completed	NEAÇ EHL 11 1:60 (T)	2023-06-06 15:48:05	2023-06-06 15:48:06	40.01	232.2	0.3353	92.22	7.78
GoodData	Size	Completed	NEAÇ EHL 11 1:60 (T)	2023-06-06 15:49:10	2023-06-06 15:49:11	40.01	236.7	0.2188	100
GoodData	Size	Completed	NEAÇ EHL 11 1:60 (T)	2023-06-06 15:50:02	2023-06-06 15:50:03	40	243.1	0.2082	100
NoData	Size	Completed	NEAÇ EHL 11 1:60 (T) (Avg)	2023-06-06 15:51:06	2023-06-06 15:51:06	40.01	238.2	0.2455	98.07	1.926
AdviceAvailable	Size	Completed	NEAÇ EHL 11 1:60 (T)	2023-06-06 15:52:03	2023-06-06 15:52:04	45.01	222.9	0.271	94.61	5.388
GoodData	Size	Completed	NEAÇ EHL 11 1:60 (T)	2023-06-06 15:53:44	2023-06-06 15:53:45	45	223.8	0.2044	100
GoodData	Size	Completed	NEAÇ EHL 11 1:60 (T)	2023-06-06 15:55:25	2023-06-06 15:55:26	45	221.3	0.1426	100
NoData	Size	Completed	NEAÇ EHL 11 1:60 (T) (Avg)	2023-06-06 15:56:55	2023-06-06 15:56:55	45.01	221.9	0.2165	98.63	1.365
AdviceAvailable	Size	Completed	NEAÇ EHL 11 1:60 (T)	2023-06-06 15:57:51	2023-06-06 15:57:52	50	210.1	0.2795	96.36	3.642
GoodData	Size	Completed	NEAÇ EHL 11 1:60 (T)	2023-06-06 15:58:56	2023-06-06 15:58:57	50.01	211.2	0.1758	100
GoodData	Size	Completed	NEAÇ EHL 11 1:60 (T)	2023-06-06 15:59:35	2023-06-06 15:59:36	50	203.8	0.1997	100
NoData	Size	Completed	NEAÇ EHL 11 1:60 (T) (Avg)	2023-06-06 16:00:40	2023-06-06 16:00:40	50	208.2	0.2205	98.61	1.389
AdviceAvailable	Size	Completed	NEAÇ EHL 11 1:60 (T)	2023-06-06 16:01:37	2023-06-06 16:01:38	55	202.7	0.2096	97.76	2.236
GoodData	Size	Completed	NEAÇ EHL 11 1:60 (T)	2023-06-06 16:02:54	2023-06-06 16:02:54	55	192.8	0.1429	100
GoodData	Size	Completed	NEAÇ EHL 11 1:60 (T)	2023-06-06 16:04:47	2023-06-06 16:04:47	55.01	193.5	0.06732	100
NoData	Size	Completed	NEAÇ EHL 11 1:60 (T) (Avg)	2023-06-06 16:06:04	2023-06-06 16:06:04	55	195.7	0.1496	100
AdviceAvailable	Size	Completed	NEAÇ EHL 11 1:60 (T)	2023-06-06 16:07:01	2023-06-06 16:07:02	59.99	191	0.2212	98.11	1.888
GoodData	Size	Completed	NEAÇ EHL 11 1:60 (T)	2023-06-06 16:08:05	2023-06-06 16:08:06	60	179.9	0.1558	100
GoodData	Size	Completed	NEAÇ EHL 11 1:60 (T)	2023-06-06 16:08:56	2023-06-06 16:08:57	60	179.4	0.1089	100
NoData	Size	Completed	NEAÇ EHL 11 1:60 (T) (Avg)	2023-06-06 16:09:34	2023-06-06 16:09:34	59.99	182.9	0.1695	100
GoodData	Size	Completed	NEAÇ EHL 11 1:60 (T)	2023-06-06 16:10:31	2023-06-06 16:10:32	65	178.1	0.1879	100
GoodData	Size	Completed	NEAÇ EHL 11 1:60 (T)	2023-06-06 16:11:46	2023-06-06 16:11:47	65	167.6	0.1069	100
GoodData	Size	Completed	NEAÇ EHL 11 1:60 (T)	2023-06-06 16:12:25	2023-06-06 16:12:26	65.01	167.2	0.06782	100
NoData	Size	Completed	NEAÇ EHL 11 1:60 (T) (Avg)	2023-06-06 16:13:28	2023-06-06 16:13:28	65	170.5	0.1284	100

## Sheet: HLB 13
Quality Indicator	Measurement Type	Result State	Sample Name	Record Created Date	Measurement Start Date And Time	Temperature (°C)	Z-Average (nm)	Polydispersity Index (PI)	Peak 1 Area by Intensity ordered by area (%)	Peak 2 Area by Intensity ordered by area (%)	Zeta Potential (mV)	Conductivity (mS/cm)
GoodData	Size	Completed	EHL 13 1:10 (DAY 0)	2025-01-14 13:43:28	2023-06-06 12:57:29	25.01	216.3	0.2247	100
AdviceAvailable	Size	Completed	EHL 13 1:10 (DAY 0)	2025-01-14 13:43:29	2023-06-06 12:58:32	25	216.5	0.2514	97.46	2.537
GoodData	Size	Completed	EHL 13 1:10 (DAY 0)	2025-01-14 13:43:29	2023-06-06 12:59:10	25	217.8	0.2647	100
NoData	Size	Completed	EHL 13 1:10 (DAY 0) (Avg)	2025-01-14 13:44:14	2023-06-06 13:00:37	25.01	216.8	0.2484	100
GoodData	Size	Completed	EHL 13 1:10 (DAY 1)	2025-01-14 13:44:35	2023-06-07 14:36:22	25	204.3	0.2297	100
GoodData	Size	Completed	EHL 13 1:10 (DAY 1)	2025-01-14 13:44:35	2023-06-07 14:37:24	25	206.8	0.2708	100
GoodData	Size	Completed	EHL 13 1:10 (DAY 1)	2025-01-14 13:44:35	2023-06-07 14:38:38	25	216.3	0.2834	100
NoData	Size	Completed	EHL 13 1:10 (DAY 1) (Avg)	2025-01-14 13:45:01	2023-06-07 14:40:53	25	208.8	0.2649	100
AdviceAvailable	Size	Completed	EHL 13 1:10 (DAY 7)	2025-01-14 13:45:16	2023-06-13 11:56:24	25	211.3	0.2071	98.96	1.041
GoodData	Size	Completed	EHL 13 1:10 (DAY 7)	2025-01-14 13:45:17	2023-06-13 11:57:02	25.01	205	0.208	100
GoodData	Size	Completed	EHL 13 1:10 (DAY 7)	2025-01-14 13:45:17	2023-06-13 11:57:39	25.01	208.6	0.1961	100
NoData	Size	Completed	EHL 13 1:10 (DAY 7) (Avg)	2025-01-14 13:45:39	2023-06-13 11:58:41	25	208.8	0.1964	100

## Sheet: HLB 13 ramp
Quality Indicator	Measurement Type	Result State	Sample Name	Record Created Date	Measurement Start Date And Time	Temperature (°C)	Z-Average (nm)	Polydispersity Index (PI)	Peak 1 Area by Intensity ordered by area (%)	Peak 2 Area by Intensity ordered by area (%)	Zeta Potential (mV)	Conductivity (mS/cm)
GoodData	Size	Completed	NEAÇ EHL 13 1:10 (T)	2023-06-06 14:20:56	2023-06-06 14:20:56	25.01	207.5	0.2691	100
GoodData	Size	Completed	NEAÇ EHL 13 1:10 (T)	2023-06-06 14:21:47	2023-06-06 14:21:48	25.01	217.4	0.2842	100
AdviceAvailable	Size	Completed	NEAÇ EHL 13 1:10 (T)	2023-06-06 14:23:02	2023-06-06 14:23:03	25	220.8	0.2781	94.33	5.667
NoData	Size	Completed	NEAÇ EHL 13 1:10 (T) (Avg)	2023-06-06 14:24:30	2023-06-06 14:24:30	25.01	215.6	0.2726	94.08	5.916
AdviceAvailable	Size	Completed	NEAÇ EHL 13 1:10 (T)	2023-06-06 14:25:26	2023-06-06 14:25:27	30.01	214.6	0.2564	97.63	2.367
GoodData	Size	Completed	NEAÇ EHL 13 1:10 (T)	2023-06-06 14:26:31	2023-06-06 14:26:31	30.01	211	0.2327	100
AdviceAvailable	Size	Completed	NEAÇ EHL 13 1:10 (T)	2023-06-06 14:27:22	2023-06-06 14:27:22	30.01	207.8	0.2269	98.95	1.051
NoData	Size	Completed	NEAÇ EHL 13 1:10 (T) (Avg)	2023-06-06 14:28:38	2023-06-06 14:28:38	30.01	211.1	0.239	98.47	1.53
GoodData	Size	Completed	NEAÇ EHL 13 1:10 (T)	2023-06-06 14:29:34	2023-06-06 14:29:34	35.01	212.9	0.2513	100
GoodData	Size	Completed	NEAÇ EHL 13 1:10 (T)	2023-06-06 14:30:51	2023-06-06 14:30:51	35.01	215.8	0.251	100
AdviceAvailable	Size	Completed	NEAÇ EHL 13 1:10 (T)	2023-06-06 14:32:19	2023-06-06 14:32:20	35	218.1	0.2416	98.95	1.048
NoData	Size	Completed	NEAÇ EHL 13 1:10 (T) (Avg)	2023-06-06 14:33:22	2023-06-06 14:33:22	35.01	215.4	0.2499	100
AdviceAvailable	Size	Completed	NEAÇ EHL 13 1:10 (T)	2023-06-06 14:34:18	2023-06-06 14:34:18	40.01	217.7	0.2515	95.67	4.332
GoodData	Size	Completed	NEAÇ EHL 13 1:10 (T)	2023-06-06 14:35:47	2023-06-06 14:35:47	40.01	214.7	0.2169	100
GoodData	Size	Completed	NEAÇ EHL 13 1:10 (T)	2023-06-06 14:36:50	2023-06-06 14:36:51	40	209.8	0.1714	100
NoData	Size	Completed	NEAÇ EHL 13 1:10 (T) (Avg)	2023-06-06 14:38:18	2023-06-06 14:38:18	40.01	213.9	0.2158	100
GoodData	Size	Completed	NEAÇ EHL 13 1:10 (T)	2023-06-06 14:39:14	2023-06-06 14:39:14	45.01	217.6	0.2634	100
GoodData	Size	Completed	NEAÇ EHL 13 1:10 (T)	2023-06-06 14:40:30	2023-06-06 14:40:31	45	208.9	0.2001	100
GoodData	Size	Completed	NEAÇ EHL 13 1:10 (T)	2023-06-06 14:41:35	2023-06-06 14:41:36	45	205.6	0.1988	100
NoData	Size	Completed	NEAÇ EHL 13 1:10 (T) (Avg)	2023-06-06 14:42:27	2023-06-06 14:42:27	45.01	210.6	0.2218	100
AdviceAvailable	Size	Completed	NEAÇ EHL 13 1:10 (T)	2023-06-06 14:43:24	2023-06-06 14:43:24	50	218.6	0.2594	97.42	2.584
GoodData	Size	Completed	NEAÇ EHL 13 1:10 (T)	2023-06-06 14:44:28	2023-06-06 14:44:29	50	207.3	0.1754	100
GoodData	Size	Completed	NEAÇ EHL 13 1:10 (T)	2023-06-06 14:45:07	2023-06-06 14:45:08	50	201	0.1129	100
NoData	Size	Completed	NEAÇ EHL 13 1:10 (T) (Avg)	2023-06-06 14:46:36	2023-06-06 14:46:36	50	207.8	0.1972	100
GoodData	Size	Completed	NEAÇ EHL 13 1:10 (T)	2023-06-06 14:47:32	2023-06-06 14:47:32	55	210.2	0.2342	100
GoodData	Size	Completed	NEAÇ EHL 13 1:10 (T)	2023-06-06 14:48:36	2023-06-06 14:48:36	55	197	0.1653	100
GoodData	Size	Completed	NEAÇ EHL 13 1:10 (T)	2023-06-06 14:49:52	2023-06-06 14:49:52	55.01	194	0.036	100
NoData	Size	Completed	NEAÇ EHL 13 1:10 (T) (Avg)	2023-06-06 14:51:07	2023-06-06 14:51:07	55	199.2	0.161	100
AdviceAvailable	Size	Completed	NEAÇ EHL 13 1:10 (T)	2023-06-06 14:52:05	2023-06-06 14:52:05	59.99	208.8	0.2551	98.97	1.034
GoodData	Size	Completed	NEAÇ EHL 13 1:10 (T)	2023-06-06 14:53:08	2023-06-06 14:53:09	60	192.9	0.07582	100
GoodData	Size	Completed	NEAÇ EHL 13 1:10 (T)	2023-06-06 14:54:23	2023-06-06 14:54:23	60.01	189.6	0.04068	100
NoData	Size	Completed	NEAÇ EHL 13 1:10 (T) (Avg)	2023-06-06 14:55:13	2023-06-06 14:55:13	59.99	194.6	0.1365	100
GoodData	Size	Completed	NEAÇ EHL 13 1:10 (T)	2023-06-06 14:56:11	2023-06-06 14:56:11	65	189.4	0.1373	100
GoodData	Size	Completed	NEAÇ EHL 13 1:10 (T)	2023-06-06 14:58:27	2023-06-06 14:58:28	65	183.9	0.0352	100
GoodData	Size	Completed	NEAÇ EHL 13 1:10 (T)	2023-06-06 15:00:08	2023-06-06 15:00:08	65	185.4	0.07785	100
NoData	Size	Completed	NEAÇ EHL 13 1:10 (T) (Avg)	2023-06-06 15:00:58	2023-06-06 15:00:58	65	185.7	0.07165	100
